# Supplementary material for: Copolyamide-Imide Membrane with Low CTE and CME for Potential Space Optical Applications
Source: MDPI journal article supplement (doi:10.3390/polym13071001), 2021-03-24
Supplement: s1 [file s1]

## Supplementary Materials

There are two stages for the thermal imidization procedure.

a. First is the stepped heating stage, the detailed heating rate showed as follow:

$$25^{\circ}\text{C} \xrightarrow[30\text{ min}]{2.5^{\circ}\text{C/min}} 100^{\circ}\text{C} (1\text{ h}) \xrightarrow[30\text{ min}]{3.3^{\circ}\text{C/min}} 200^{\circ}\text{C} (1\text{ h}) \xrightarrow[45\text{ min}]{3.3^{\circ}\text{C/min}} 350^{\circ}\text{C} (1\text{ h})$$

b. Then is the cooling stage, the detailed cooling rate showed as follow:

$$350^{\circ}\text{C} \xrightarrow[420\text{ min}]{-0.77^{\circ}\text{C/min}} 25^{\circ}\text{C}$$

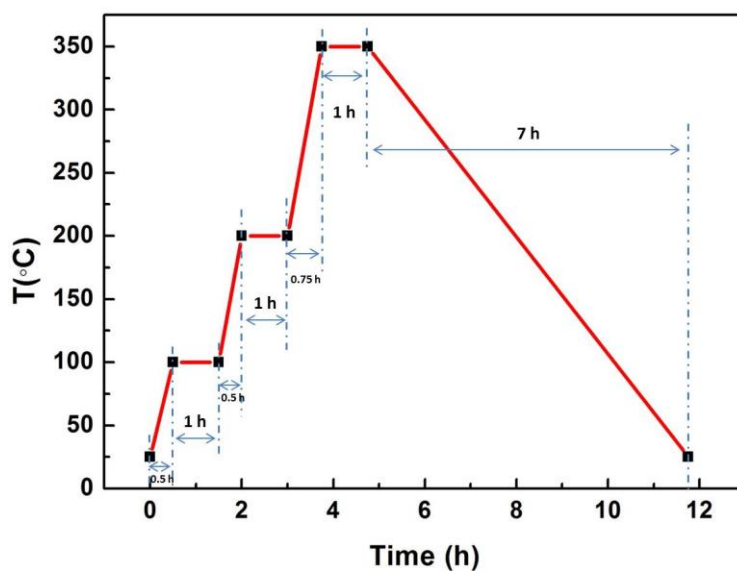

Figure S1. Thermal imidization procedure.
